# Supplementary material for: Early Life Exposure to Aflatoxin B1 in Rats: Alterations in Lipids, Hormones, and DNA Methylation among the Offspring
Source: PubMed Central journal article supplement (PMC7828191; doi:10.3390/ijerph18020589), 2021-01-12
Supplement: ijerph-18-00589-s001.pdf [file ijerph-18-00589-s001.pdf]

**Table S1.** Primers for DNA Methylation Analysis via Pyrosequencing.

| Gene        | Genomic Location of Amplicon * | Forward Primer           | Reverse Primer                          | Sequencing Primer        | # CpG Sites | Details on region                                  |
|-------------|--------------------------------|--------------------------|-----------------------------------------|--------------------------|-------------|----------------------------------------------------|
| <i>Tp53</i> | chr10: 56185594-56186023       | TGGGGTTGGGATTAGGTTAGAAG  | Biotin-ACTACACCTCCCAAAAACCT             | GTAATTAAAAGTAAATAGAGGA   | 9           | promoter                                           |
| <i>H19</i>  | chr1: 215749439-215749579      | GTTTTTGGATTTTAAATTAGTTAG | Biotin-<br>TCCCCAAAAATTA ACTACTTCTAAACT | GTTTTTGGATTTTAAATTAGTTAG | 6           | imprinting control region (ICR)<br>in the promoter |

\* From July 2014 Assembly (RGSC 6.0/rn6).
